# Supplementary material for: Conversion of a zinc salicylate complex into porous carbons through a template carbonization process as a superior electrode material for supercapacitors
Source: Royal Society of Chemistry journal article supplement (doi:10.1039/c3ra44981e), 2013-11-14
Supplement: c3ra44981e.pdf [file c3ra44981e.pdf]

## Supporting Information:

### 1. Electrochemical measurements employed in the present work.

#### ► Measurements conducted in a three-electrode system using 6 mol L<sup>-1</sup> KOH as electrolyte:

A mixture of 80 wt% the carbon sample (~ 4 mg), 15 wt% acetylene black and 5 wt% polytetrafluoroethylene (PTFE) binder was fabricated using ethanol as a solvent. Slurry of the above mixture was subsequently pressed onto nickel foam under a pressure of 20 MPa, serving as the current collector. The prepared electrode was placed in a vacuum drying oven at 120 °C for 24 h. A three electrode experimental setup taking a 6 mol L<sup>-1</sup> KOH aqueous solution as electrolyte was used in cyclic voltammetry and galvanostatic charge-discharge measurements on an electrochemical working station (CHI660D, ChenHua Instruments Co. Ltd., Shanghai). Here, the prepared electrode, platinum foil (6 cm<sup>2</sup>) and saturated calomel electrode (SCE) were used as the working, counter and reference electrodes, respectively.

Specific capacitances derived from galvanostatic tests can be calculated from the equation:

$$C = \frac{I\Delta t}{m\Delta V}$$

where  $C$  (F g<sup>-1</sup>) is the specific capacitance;  $I$  (A) is the discharge current;  $\Delta t$  (s) is the discharge time;  $\Delta V$  (V) is the potential window; and  $m$  (mg) is the mass of active materials loaded in working electrode.

Specific capacitances derived from cyclic voltammetry tests can be calculated from the equation:

$$C = \frac{1}{mv(V_b - V_a)} \int_{V_a}^{V_b} IdV$$

where  $C$  (F g<sup>-1</sup>) is the specific capacitance;  $m$  (mg) is the mass of active materials loaded in working electrode;  $v$  (V s<sup>-1</sup>) is the scan rate;  $I$  (A) is the discharge current;  $V_b$  and  $V_a$  (V) are high and low potential limit of the CV tests.

Specific energy density (E) and specific power density (P) derived from

galvanostatic tests can be calculated from the equations:

$$E = \frac{1}{2} C \Delta V^2$$

$$P = \frac{E}{\Delta t}$$

where  $E$  (Wh kg<sup>-1</sup>) is the average energy density;  $C$  (F g<sup>-1</sup>) is the specific capacitance;  $\Delta V$  (V) is the potential window;  $P$  (W kg<sup>-1</sup>) is the average power density and  $\Delta t$  (s) is the discharge time.

➤ **Measurements conducted in a two-electrode system using [EMIm]BF<sub>4</sub>/AN as electrolyte:**

In a two-electrode cell, [EMIm]BF<sub>4</sub> and acetonitrile (AN) (weight ratio of 1:1) was adopted as electrolyte. A glassy paper separator was sandwiched between two electrodes, and each electrode contains a mixture of 80 wt% the carbon sample (~ 2 mg), 15 wt% acetylene black and 5 wt% polytetrafluoroethylene (PTFE) binder. Nickel foam serves as the current collector. The assembly of the test cell was done in a glove box filled with Ar.

Specific capacitances derived from galvanostatic tests can be calculated from the equation:

$$C = \frac{4I\Delta t}{m\Delta V}$$

where  $C$  (F g<sup>-1</sup>) is the specific capacitance;  $I$  (A) is the discharge current;  $\Delta t$  (s) is the discharge time;  $\Delta V$  (V) is the potential window; and  $m$  (mg) is the total mass of two electrodes.

Specific capacitances derived from cyclic voltammetry tests can be calculated from the equation:

$$C = \frac{2}{m\nu(V_b - V_a)} \int_{V_a}^{V_b} IdV$$

where  $C$  (F g<sup>-1</sup>) is the specific capacitance;  $m$  (mg) is the mass of active materials loaded in working electrode;  $\nu$  (V s<sup>-1</sup>) is the scan rate;  $I$  (A) is the discharge current;  $V_b$

and  $V_a$  (V) are high and low potential limit of the CV tests.

Specific energy density ( $E$ ) and specific power density ( $P$ ) derived from galvanostatic tests can be calculated from the equations:

$$E = \frac{1}{8} C \Delta V^2$$

$$P = \frac{E}{\Delta t}$$

where  $E$  (Wh kg<sup>-1</sup>) is the average energy density;  $C$  (F g<sup>-1</sup>) is the specific capacitance;  $\Delta V$  (V) is the potential window;  $P$  (W kg<sup>-1</sup>) is the average power density and  $\Delta t$  (s) is the discharge time.

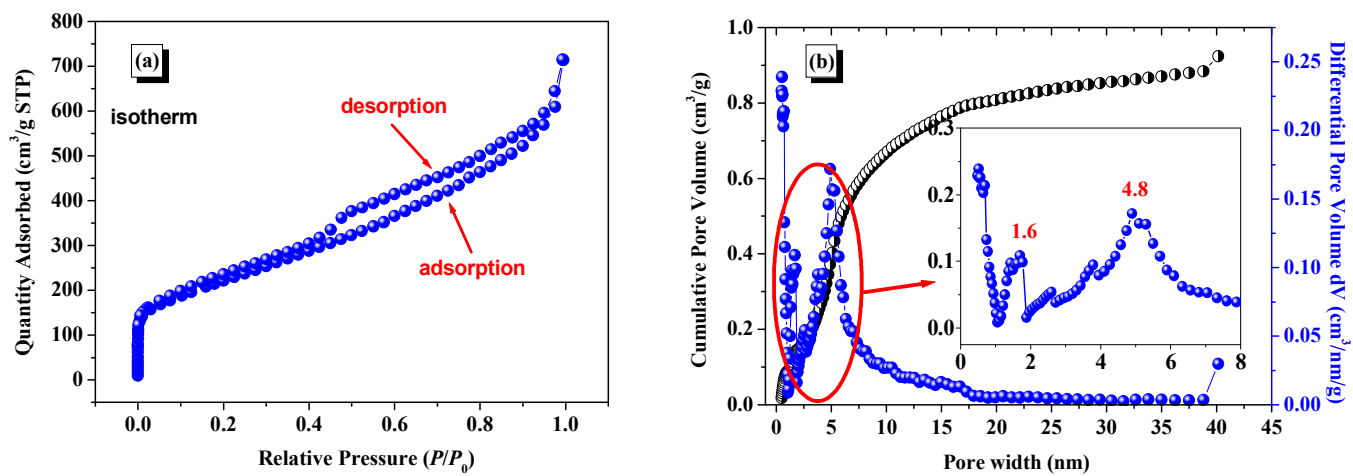

**Fig. S1.** Carbon-Zn-900 sample: (a) N<sub>2</sub> adsorption-desorption isotherm; (b) Cumulative pore volume and pore size distribution curves (calculated by using a slit/cylindrical NLDFT model).

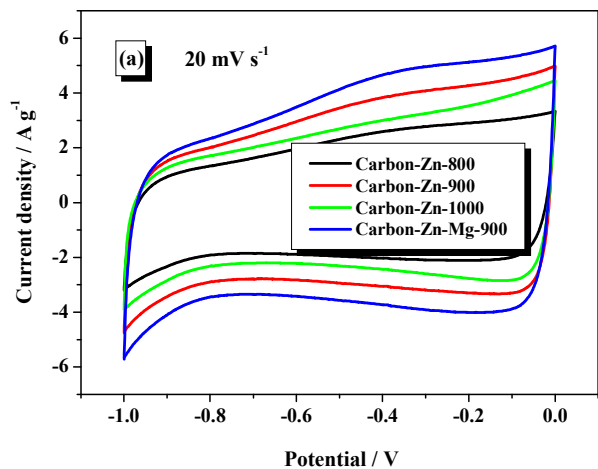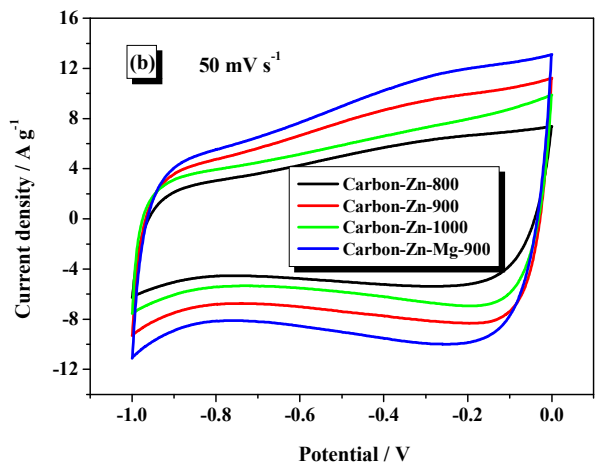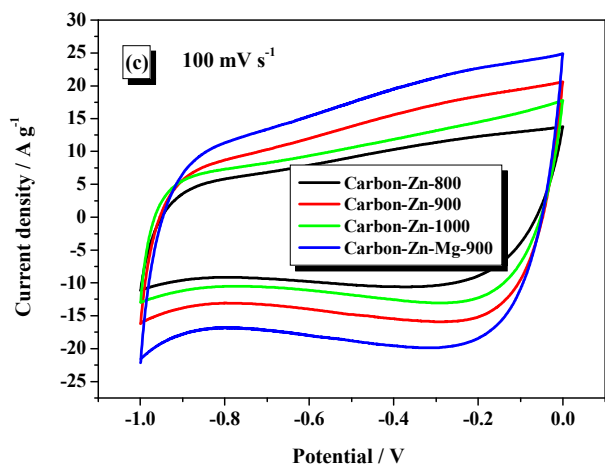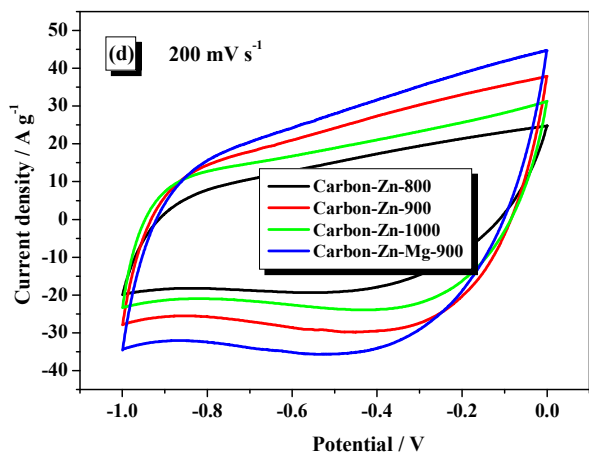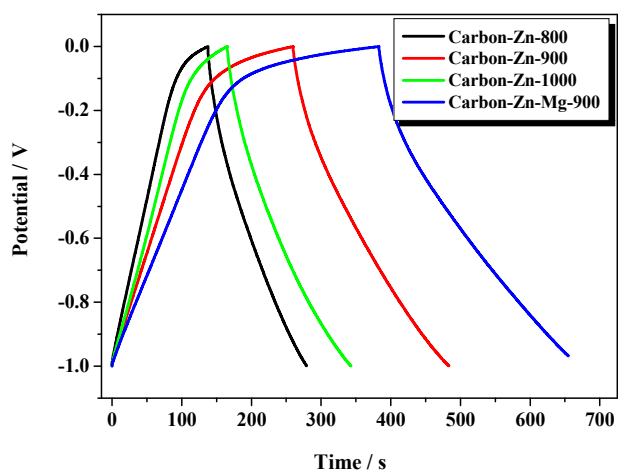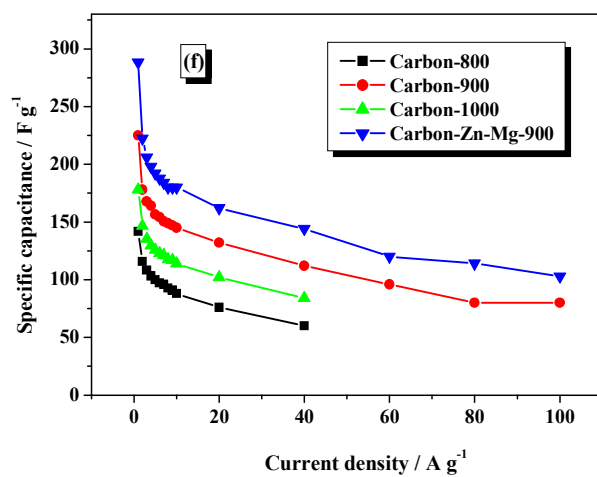

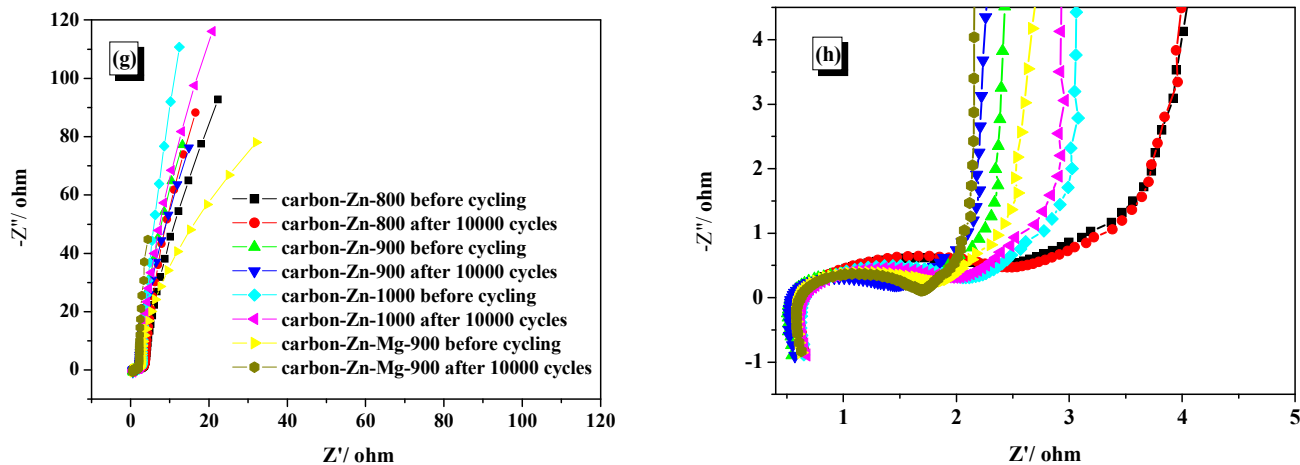

**Fig. S2.** The carbon-Zn-800/900/1000, carbon-Zn-Mg-900 samples measured in a three-electrode system using  $6 \text{ mol L}^{-1}$  KOH as electrolyte: CV curves at various scan rates: (a)  $20 \text{ mV s}^{-1}$ ; (b)  $50 \text{ mV s}^{-1}$ ; (c)  $100 \text{ mV s}^{-1}$ ; (d)  $200 \text{ mV s}^{-1}$ ; (e) galvanostatic charge-discharge curves at various current densities as well as the calculated specific capacitances (f); (g) Nyquist plots before/after 10000 cycles, as well as the magnified Nyquist plots (h).

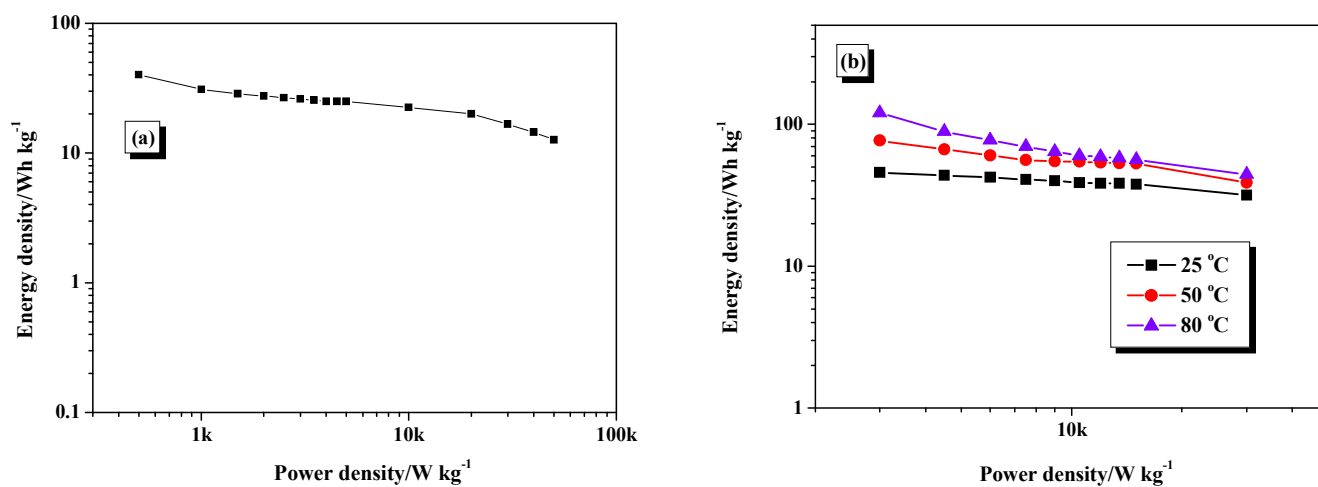

**Fig. S3.** Ragone plots of the carbon-Zn-Mg-900 sample showing energy density vs. power density measured (a) in a three-electrode system using 6 mol L<sup>-1</sup> KOH as electrolyte and (b) in a two-electrode system using [EMIm]BF<sub>4</sub>/AN as electrolyte at the operation temperatures of 25/50/80 °C.
